# Supplementary material
Source: ML conference proceedings conference paper supplement (https://www.ecva.net/papers/eccv_2020/papers_ECCV/html/123660154_ECCV_2020_paper.php)
Supplement: Supplementary file 2 [file 123660154-supp.zip]

Archive with 2 entries (2 files):
- supplementary_3672.pdf
- video_3672.mp4
